# Supplementary material
Source: MDPI journal article supplement (https://www.mdpi.com/1999-4907/7/9/205)
Supplement: s1 [file s1]

Supplementary Materials: Fires of the Last Millenium Led to Landscapes Dominated by Early Successional Species in Québec’s Clay Belt Boreal Forest, Canada

Maxime Asselin, Pierre Grondin, Martin Lavoie and Bianca Fréchette

**Table S1.** Description of the eight forest landscapes delineated in the study area (Figure 3). The two peatlands studied are located in landscape P4b. Results are expressed in relative importance of surface area.

| **Forest Landscape** | **Potr** | **Pima-Abba** | **Piba** | **Pima-Mineral  Soil** | **Pima-Organic Soil** | **Open Peatland** |
| --- | --- | --- | --- | --- | --- | --- |
| P1a | 0.00 | 0 | 0.44 | 60.50 | 28.38 | 10.69 |
| P1b | 2.06 | 1.12 | 0.03 | 39.12 | 32.56 | 24.92 |
| P2a | 0.46 | 1.56 | 0.09 | 74.59 | 17.41 | 5.71 |
| P2b | 7.29 | 0.79 | 1.55 | 64.96 | 14.07 | 11.06 |
| P3a | 1.87 | 17.29 | 0.00 | 67.93 | 8.34 | 4.15 |
| P3b | 1.36 | 4.54 | 1.43 | 78.56 | 9.53 | 4.15 |
| P4a | 3.46 | 0.54 | 11.68 | 70.21 | 9.63 | 4.16 |
| P4b | 23.20 | 1.22 | 4.94 | 59.95 | 7.58 | 2.95 |

Forest types: Potr: stands dominated or sub-dominated by *Populus. tremuloides*, Pima-Abba: *Picea. mariana and Abies. balsamea*, Piba: *Pinus. banksiana*, Pima: *Picea. mariana.*

| **Forest Landscape** | **Surficial Deposit** | | | | **Drainage** | | | **Slope** | | |
| --- | --- | --- | --- | --- | --- | --- | --- | --- | --- | --- |
| **1A** | **4GA** | **4GS** | **7** | **1–2–3** | **4** | **5–6** | **A** | **B** | **C–D** |
| P1a | 4.8 | 65.7 | 0.0 | 29.4 | 8.9 | 18.1 | 73.0 | 87.3 | 11.3 | 1.4 |
| P1b | 10.5 | 44.3 | 0.4 | 44.8 | 14.7 | 30.3 | 55.0 | 75.8 | 20.6 | 3.6 |
| P2a | 15.1 | 64.9 | 0.5 | 19.5 | 23.8 | 53.2 | 23.1 | 61.2 | 31.4 | 7.3 |
| P2b | 13.9 | 69.7 | 0.6 | 15.8 | 27.2 | 41.5 | 31.3 | 62.9 | 31.8 | 5.3 |
| P3a | 8.4 | 83.9 | 0.2 | 7.5 | 30.8 | 36.4 | 32.6 | 47.9 | 44.5 | 7.5 |
| P3b | 35.8 | 53.0 | 1.0 | 10.2 | 35.7 | 39.5 | 24.8 | 52.4 | 36.3 | 11.3 |
| P4a | 32.7 | 55.4 | 2.0 | 9.9 | 44.0 | 39.4 | 16.6 | 48.1 | 37.0 | 14.9 |
| P4b | 19.5 | 70.1 | 3.0 | 7.4 | 37.7 | 46.6 | 15.7 | 46.0 | 45.3 | 8.7 |

Surficial deposit: 1A (till), 4GA (clay), 4GS (sand), 7 (organic soil). Drainage: xeric (1–2), mesic (3), subhydric (4), hydric (5–6). Slope: very low (A, 0%–3%), low (B, 4%–7%), moderate (C: 8%–15%), high (D: 16%–30%).

| **Forest Landscape** | **Altitude (m)—Relative Importance by Class** | | | | **Fire Origin Period** | | |
| --- | --- | --- | --- | --- | --- | --- | --- |
| **225–250** | **250–275** | **275–300** | **300–375** | **1820** | **1910** | **1970** |
| P1a | 0.0 | 100.0 | 0.0 | 0.0 | 90.2 | 9.8 | 0.0 |
| P1b | 2.3 | 89.6 | 7.4 | 0.7 | 35.8 | 63.8 | 0.3 |
| P2a | 16.9 | 74.2 | 5.8 | 3.1 | 88.5 | 3.4 | 8.1 |
| P2b | 0.0 | 61.7 | 29.5 | 8.8 | 13.7 | 86.2 | 0.1 |
| P3a | 0.0 | 78.2 | 20.0 | 1.7 | 95.8 | 4.2 | 0.0 |
| P3b | 0.0 | 11.9 | 50.5 | 37.6 | 66.8 | 31.9 | 1.4 |
| P4a | 0.0 | 33.6 | 29.0 | 37.4 | 32.8 | 67.1 | 0.0 |
| P4b | 0.0 | 26.0 | 55.4 | 18.6 | 13.2 | 86.8 | 0.0 |

**Table S2.** Description of the contemporary vegetation surrounding the lakes studied in the western part of Québec’s boreal forest. The description is based on QMFFP maps and considers a 15 km2 radius around each lake or peatland.

| **Lake or Peatland** | **Surficial Deposit** | | | | | | **Drainage** | | | | |
| --- | --- | --- | --- | --- | --- | --- | --- | --- | --- | --- | --- |
| **1A** | **1AA** | **2A** | **4** | **7** | **R** | **1–2** | **3** | **4** | **5** | **6** |
| Aspen | 8.3 | 0.0 | 0.8 | 58.9 | 30.2 | 1.9 | 2.6 | 20.4 | 38.3 | 20.5 | 18.2 |
| Shadow | 9.7 | 0.0 | 0.7 | 55.2 | 32.5 | 1.9 | 2.3 | 17.3 | 37.9 | 22.3 | 20.2 |
| Francis | 15.0 | 0.0 | 0.4 | 64.8 | 11.7 | 8.1 | 11.9 | 45.7 | 27.6 | 6.5 | 8.4 |
| Pas de fond | 13.2 | 0.0 | 2.9 | 50.1 | 29.2 | 4.6 | 9.8 | 23.4 | 33.1 | 13.7 | 20.2 |
| Cèdres | 6.3 | 0.0 | 2.3 | 45.0 | 44.7 | 1.7 | 4.0 | 20.6 | 19.5 | 26.9 | 28.9 |
| Schön | 7.6 | 3.1 | 0.9 | 32.8 | 51.2 | 4.3 | 6.7 | 14.3 | 23.3 | 17.5 | 38.3 |
| Garot | 1.8 | 2.0 | 0.3 | 29.0 | 64.8 | 2.2 | 0.9 | 11.9 | 20.3 | 11.1 | 55.7 |
| Pessière | 1.8 | 3.3 | 1.3 | 22.4 | 70.5 | 0.7 | 0.9 | 6.8 | 20.7 | 22.8 | 48.8 |
| Geais | 6.7 | 26.2 | 0.6 | 0.0 | 66.3 | 0.2 | 1.4 | 8.4 | 12.4 | 25.8 | 52.0 |
| Profond | 5.6 | 24.6 | 0.3 | 0.0 | 69.5 | 0.0 | 1.2 | 7.4 | 11.4 | 23.7 | 56.2 |
| Raynald | 4.9 | 22.4 | 0.1 | 0.0 | 72.6 | 0.0 | 1.3 | 7.0 | 9.7 | 21.7 | 60.3 |
| Loutre | 3.2 | 9.9 | 0.2 | 12.1 | 74.5 | 0.1 | 1.5 | 3.7 | 11.3 | 20.8 | 62.7 |
| Twin | 73.8 | 0.0 | 6.7 | 0.0 | 14.7 | 4.8 | 19.2 | 55.0 | 10.8 | 3.9 | 11.1 |
| Richard | 72.7 | 0.0 | 5.4 | 0.0 | 20.6 | 1.3 | 10.1 | 53.3 | 14.5 | 7.8 | 14.4 |
| Aurelie | 71.5 | 0.0 | 10.8 | 0.1 | 14.4 | 3.2 | 17.6 | 56.2 | 11.0 | 7.7 | 7.5 |
| Nans | 62.5 | 0.0 | 15.8 | 0.5 | 17.5 | 3.7 | 21.2 | 50.0 | 9.8 | 7.5 | 11.6 |

Forest types: Bepa: stands dominated or sub-dominated by *Betula. papyrifera*, Pima: *Picea. mariana*, Piba*: Pinus. banksiana*, Potr : *Populus. tremuloides*, Abba: *Abies. balsamea*, O*pen peat*, *Open peatland,* Others: mainly anthropic activities, as farmland, Burn: area cover by natural fire.

| **Lake or Peatland** | **Surficial Deposit** | | | | | | **Drainage** | | | | |
| --- | --- | --- | --- | --- | --- | --- | --- | --- | --- | --- | --- |
| **1A** | **1AA** | **2A** | **4** | **7** | **R** | **1–2** | **3** | **4** | **5** | **6** |
| Aspen | 8.3 | 0.0 | 0.8 | 58.9 | 30.2 | 1.9 | 2.6 | 20.4 | 38.3 | 20.5 | 18.2 |
| Shadow | 9.7 | 0.0 | 0.7 | 55.2 | 32.5 | 1.9 | 2.3 | 17.3 | 37.9 | 22.3 | 20.2 |
| Francis | 15.0 | 0.0 | 0.4 | 64.8 | 11.7 | 8.1 | 11.9 | 45.7 | 27.6 | 6.5 | 8.4 |
| Pas de fond | 13.2 | 0.0 | 2.9 | 50.1 | 29.2 | 4.6 | 9.8 | 23.4 | 33.1 | 13.7 | 20.2 |
| Cèdres | 6.3 | 0.0 | 2.3 | 45.0 | 44.7 | 1.7 | 4.0 | 20.6 | 19.5 | 26.9 | 28.9 |
| Schön | 7.6 | 3.1 | 0.9 | 32.8 | 51.2 | 4.3 | 6.7 | 14.3 | 23.3 | 17.5 | 38.3 |
| Garot | 1.8 | 2.0 | 0.3 | 29.0 | 64.8 | 2.2 | 0.9 | 11.9 | 20.3 | 11.1 | 55.7 |
| Pessière | 1.8 | 3.3 | 1.3 | 22.4 | 70.5 | 0.7 | 0.9 | 6.8 | 20.7 | 22.8 | 48.8 |
| Geais | 6.7 | 26.2 | 0.6 | 0.0 | 66.3 | 0.2 | 1.4 | 8.4 | 12.4 | 25.8 | 52.0 |
| Profond | 5.6 | 24.6 | 0.3 | 0.0 | 69.5 | 0.0 | 1.2 | 7.4 | 11.4 | 23.7 | 56.2 |
| Raynald | 4.9 | 22.4 | 0.1 | 0.0 | 72.6 | 0.0 | 1.3 | 7.0 | 9.7 | 21.7 | 60.3 |
| Loutre | 3.2 | 9.9 | 0.2 | 12.1 | 74.5 | 0.1 | 1.5 | 3.7 | 11.3 | 20.8 | 62.7 |
| Twin | 73.8 | 0.0 | 6.7 | 0.0 | 14.7 | 4.8 | 19.2 | 55.0 | 10.8 | 3.9 | 11.1 |
| Richard | 72.7 | 0.0 | 5.4 | 0.0 | 20.6 | 1.3 | 10.1 | 53.3 | 14.5 | 7.8 | 14.4 |
| Aurelie | 71.5 | 0.0 | 10.8 | 0.1 | 14.4 | 3.2 | 17.6 | 56.2 | 11.0 | 7.7 | 7.5 |
| Nans | 62.5 | 0.0 | 15.8 | 0.5 | 17.5 | 3.7 | 21.2 | 50.0 | 9.8 | 7.5 | 11.6 |

Surficial deposit: 1A till, 1AA Cochrane Till, 2A: fluvio-glacial, 4: glacio-lacustrine (clay or sand), 7: organic, R: Roc. Drainage: xeric (1–2), mesic (3), subhydric (4), hydric (5–6). Results are expressed in relative importance of surface area.


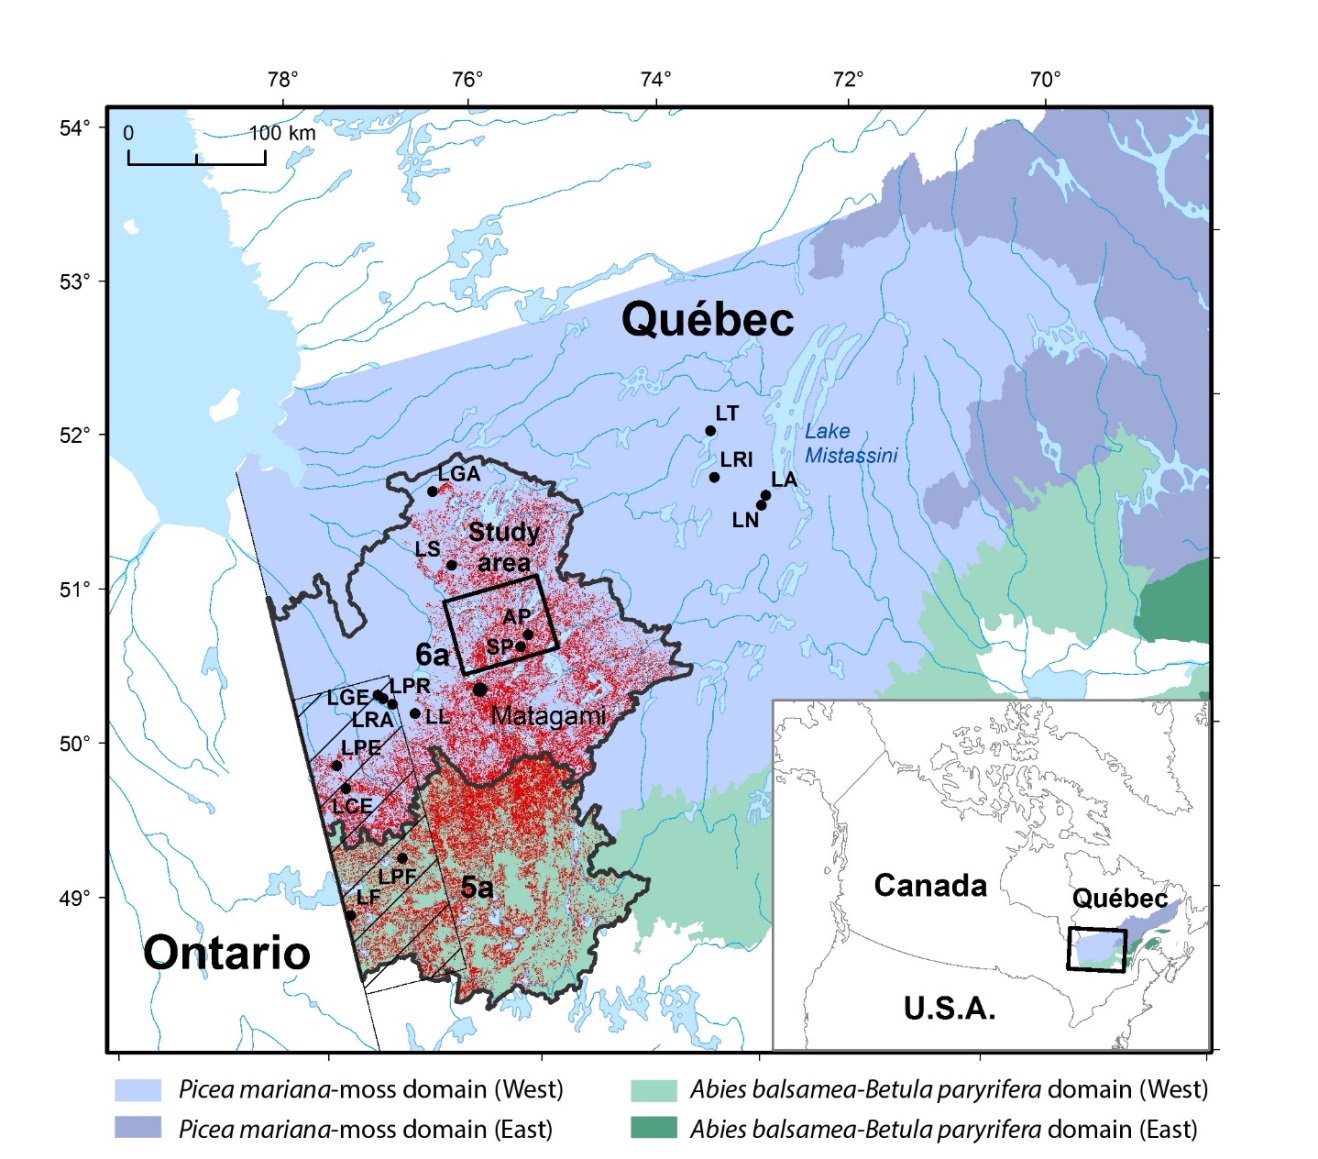


**Figure S1.** Delimitation of the study area in the western *Picea mariana*-moss bioclimatic domain in Quebec, Canada and in the ecological region 6a (Plaine du lac Matagami). Ecological region 5a (Plaine du lac Abitibi) is part of the western *Abies balsamea-Betula papyrifera* bioclimatic domain. The long transect with oblique lines located close to the border with Ontario corresponds to the fire origin map of Bergeron et al. (2004). The red dots indicate the clay distribution according to QMFFP forest maps. This clay corresponds to the Quebec parts of Clay Belt. Codes with a P (peatland) or a L (lakes) correspond to paleoecological studies considered in this study. AP : Aspen peatland, SP : Shadow peatland, LA: Lake Aurélie, LCE : Lake Cèdres, LF : Lake Francis, LGA : Lake Garot, LGE : Lake Geais, LL : Lake Loutre, LN: Lake Nans, LPE : Lake Pessière, LPF : Lake Pas de Fond, LPR: Lake Profond, LRA : Lake Raynald, LRI: Lake Richard, LS: Lake Shön, LT: Lake Twin.
